# Supplementary material
Source: PubMed Central journal article supplement (PMC2735992)
Supplement: pp.109.141598_2.pdf [file pp.109.141598_2.pdf]

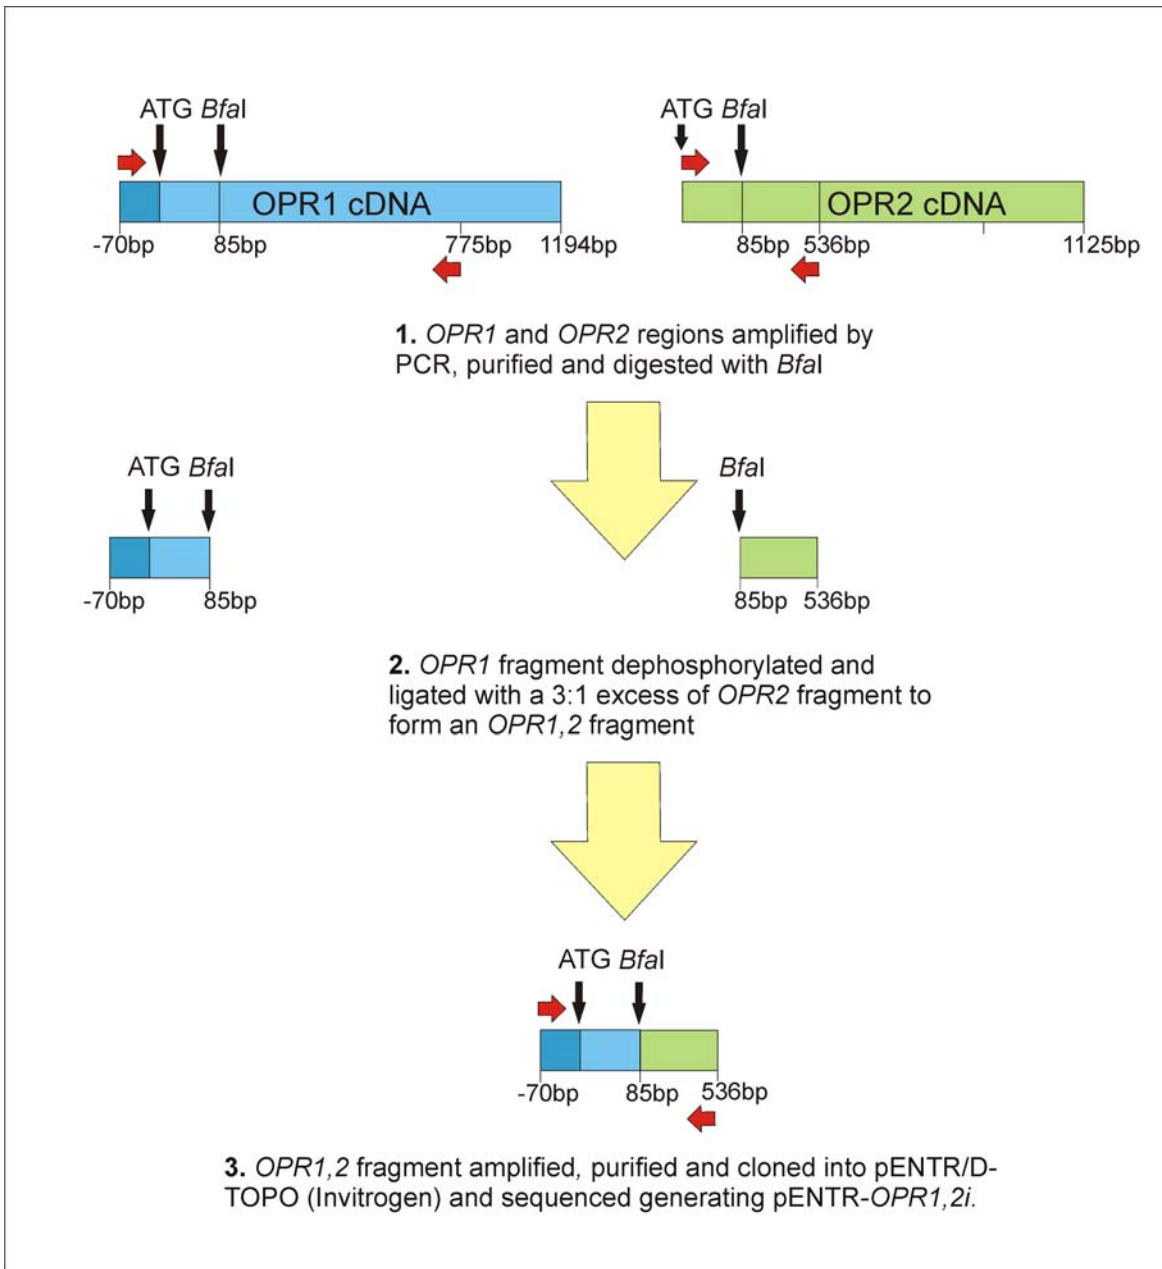

**Figure S2** Construction of the RNAi *OPR1,2i* vector. The construct included a 155 bp region of *OPR1* and 451 bp region of *OPR2*, linked via a *Bfal* restriction site, to give a construct containing a 614 bp chimeric sequence of *OPR1* and *OPR2*.
