# Supplementary material
Source: PubMed Central journal article supplement (PMC2735992)
Supplement: pp.109.141598_3.pdf [file pp.109.141598_3.pdf]

| PCR reaction                                                                  | Primer name          | Primer sequence                |
|-------------------------------------------------------------------------------|----------------------|--------------------------------|
| Cloning <i>OPR</i> overexpression constructs ( <i>oxOPRs</i> )                | oxOPR1F              | GGTACCATGGAAAACGGAGAAGCAAACAG  |
|                                                                               | oxOPR2F              | GGTACCATGGAAATGGTAAACGCAGAAGC  |
|                                                                               | oxOPR3F              | CTCGAGATGACGGCGGCACAAG         |
|                                                                               | oxOPR1R              | GGATCCTTAAGCTGTTGATTCGAGGAAAGG |
|                                                                               | oxOPR2R              | TCTAGATTAAGCTGTTGATTCAGGGAAGGG |
|                                                                               | oxOPR3R              | ATCGATCAGAGGCGGAAAAAGGAG       |
| Cloning <i>OPR</i> knockdown constructs ( <i>kdOPRs</i> )                     | kdOPR1F              | CACCACAATTCAGGGAAAATC          |
|                                                                               | kdOPR2F              | TGGTAAACGCAGAAGCAAAA           |
|                                                                               | kdOPR1R              | TCCGCCATATAAAGCCCTAA           |
|                                                                               | kdOPR2R              | CCATCAAAACCAGCTTCCATAG         |
| Quantitative RT-PCR on WT and <i>OPR</i> knock down lines ( <i>kdOPRs</i> )   | qOPR1F               | ATCCAGGAGCATTAGGGC             |
|                                                                               | qOPR2F               | CCAGAAGCATTAGGGCTG             |
|                                                                               | qOPR3F               | AAAGCTCGCTTACCTTCACGTT         |
|                                                                               | qOPR4F               | CTTCGAATGCACGGAATCG            |
|                                                                               | qOPR1R               | CGCTTTCCTCATCGGCAT             |
|                                                                               | qOPR2R               | GGCTTCCCTCATTGGCAT             |
|                                                                               | qOPR3R               | CATCACTCCCTTGCCTTCCA           |
|                                                                               | qOPR4R               | TCCTCCTGCTACTATGAACGTACCT      |
|                                                                               | qACTF                | GCTGACCGTATGAGCAAAGAAAT        |
|                                                                               | qACTR                | TACTTCCTTTCAGGTGGTGCAA         |
|                                                                               | <i>OPR1</i> probe    | GGGAGAAGTACATGCTTGTC           |
|                                                                               | <i>OPR2</i> probe    | GGGAGAAATAGCAGCGTGTC           |
|                                                                               | <i>OPR3</i> probe    | CACAACCTCGCTACCACGCCTACGG      |
|                                                                               | <i>OPR4</i> probe    | TACGCCCATGCGAAAAGCCTTCA        |
|                                                                               | <i>Actin</i> probe   | ACAGCACTTGACCAAGCAGCATGA       |
| Semi-quantitative RT-PCR on <i>OPR</i> overexpression lines ( <i>oxOPRs</i> ) | sqOPR1F              | GCCTCACGCTGCCATATATTA          |
|                                                                               | sqOPR2F              | TGGTAAACGCAGAAGCAAAA           |
|                                                                               | sqOPR3F              | CGGCGTTGGCAGAGTATTAT           |
|                                                                               | sqOPR1R              | TCCGCCATATAAAGCCCTAA           |
|                                                                               | sqOPR2R              | TGGTAAACGCAGAAGCAAAA           |
|                                                                               | sqOPR3R              | GCAAAACAGAGTCTGGAAGGC          |
|                                                                               | sqACTF               | CTTACAATTTCCCGCTCTGC           |
| sqACTR                                                                        | GTTGGGATGAACCAGAAGGA |                                |
| Amplifying <i>OPR1</i>                                                        | OPR1F                | GACCCCACTGGTTATGTTCTG          |
|                                                                               | OPR1R                | ACCTGCAACAACAAGGACACAT         |
| Amplifying <i>OPR2</i>                                                        | OPR2F                | TGGTAAACGCAGAAGCAAAA           |
|                                                                               | OPR2R                | GCTCTCTCCGTTGCAGACT            |
|                                                                               | OPR2-seq             | TGGTAAACGCAGAAGCAAAA           |
| T-DNA border                                                                  | LBa1                 | TGGTTCACGTAGTGGCCATCG          |

**Supplemental Table SI** DNA primer sequences used for cloning oxophytodienoate reductases. Primer sequences to OPR1, OPR2 and OPR3 used for production of over expressing and knock down constructs and gene expression analysis.
